# Supplementary material for: Directly deposited Nafion/TiO2 composite membranes for high power medium temperature fuel cells
Source: Royal Society of Chemistry journal article supplement (doi:10.1039/c5ra27462a), 2016-01-01
Supplement: c5ra27462a1.pdf [file c5ra27462a1.pdf]

# Supplementary Information

---

## **“Directly deposited Nafion/TiO<sub>2</sub> composite membranes for high power medium temperature fuel cells”**

*Niklas Wehkamp<sup>1,5\*</sup>, Matthias Breitwieser<sup>1</sup>, Andreas Büchler<sup>2</sup>, Matthias Klingele<sup>1</sup>, Roland Zengerle<sup>1,3</sup>, Simon Thiele<sup>1,4</sup>*

\* Corresponding author, E-mail: [Niklas.Wehkamp@uniklinik-freiburg.de](mailto:Niklas.Wehkamp@uniklinik-freiburg.de)

1. Laboratory for MEMS Applications, IMTEK Department of Microsystems Engineering, University of Freiburg, Georges-Koehler-Allee 103, 79110 Freiburg, Germany.
2. Fraunhofer Institute for Solar Energy Systems, Heidenhofstr. 2, 79110 Freiburg, Germany
3. BIOS- Centre for Biological Signalling Studies, University Freiburg
4. FIT, University of Freiburg, Georges-Köhler-Allee 105, 79110 Freiburg, Germany
5. Department of Radiology, Medical Physics, University Hospital Freiburg, Germany

## 1. EDX-measurements

EDX-measurements were performed on the MEA-cross section shown in Figure 3 in the manuscript. By comparing the two measurement points (TGeMap6 and TGeMap7) it can be seen that the observed agglomerates correspond to  $\text{TiO}_2$  particles. The point TGeMap 6 showed a reduced content of  $\text{TiO}_2$ , proving that  $\text{TiO}_2$  nanoparticles are also dispersed within the membrane ionomer.

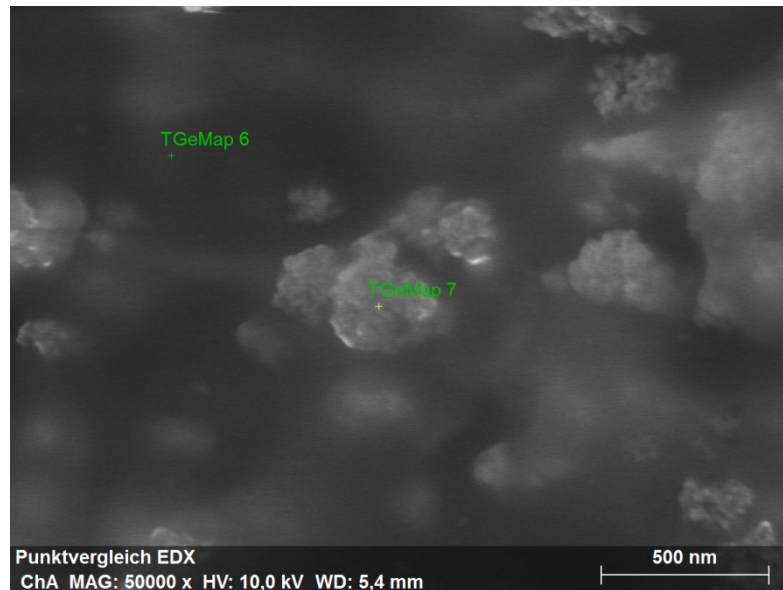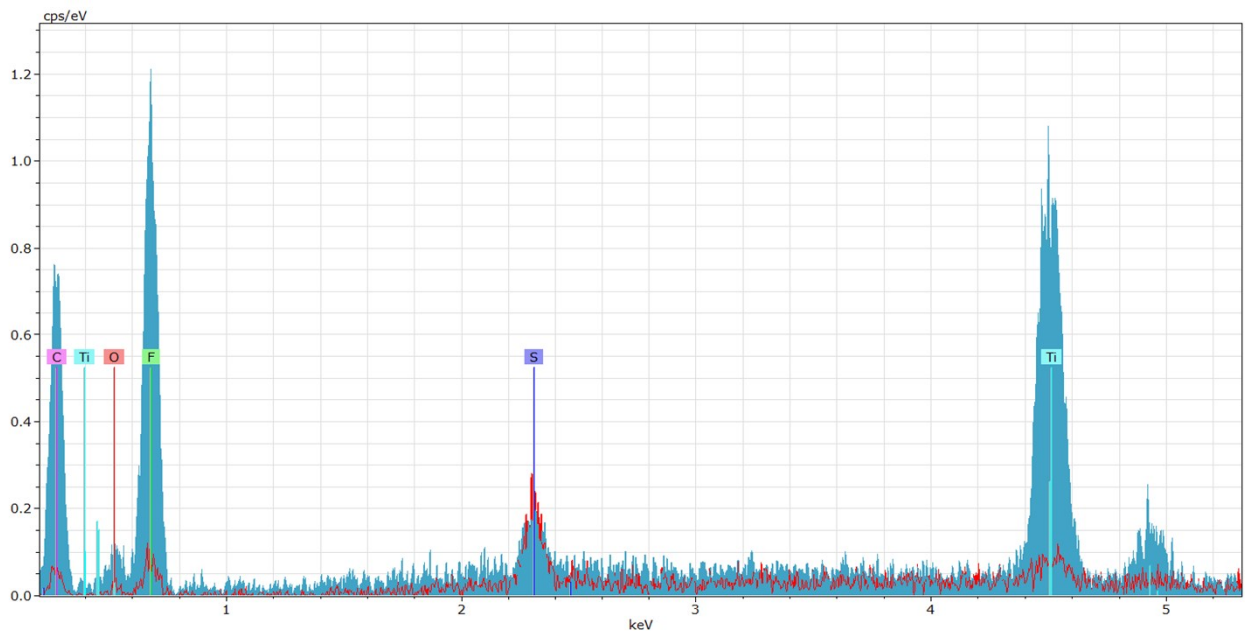

**Figure 1:** EDX-measurement of a MEA cross-section of the directly deposited  $\text{TiO}_2$ /Nafion membrane. The red spectrum corresponds to the point TGeMap 6, the green spectrum corresponds to the point TGeMap 7.

## 2. Polarization measurements

To avoid confusion about the different membrane thicknesses of the DMD samples, additional polarization measurements are shown here at an operation temperature of 120 °C (same operation conditions: 0.5/0.5 l/min H<sub>2</sub>/O<sub>2</sub>, 300/300 kPa<sub>abs</sub> ). Figure 2 includes all samples presented in the work: The Nafion HP reference sample, the 15 μm thick TiO<sub>2</sub>/Nafion DMD sample, the 20 μm thick TiO<sub>2</sub>/Nafion DMD sample and the 20 μm thick pure Nafion DMD sample.

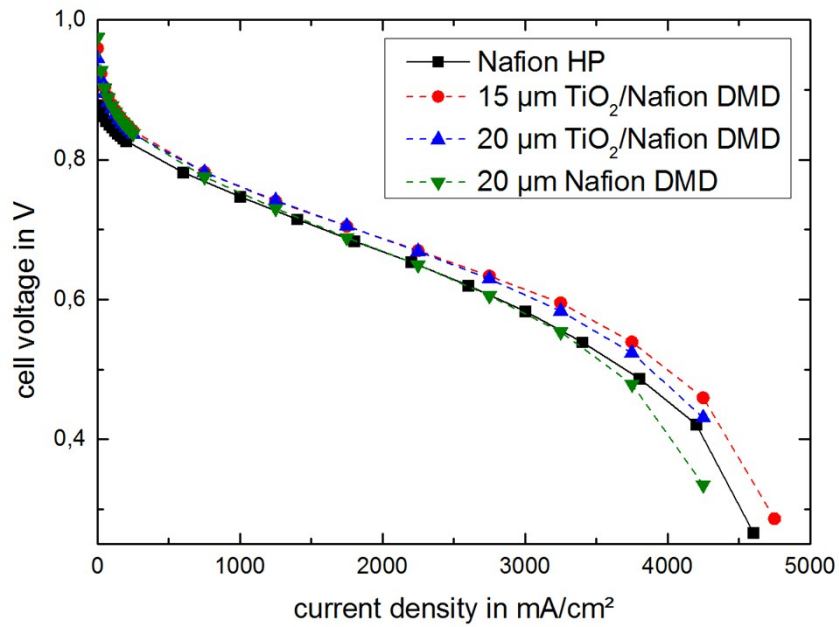

**Figure 2:** Comparison of polarization data of different DMD samples and the Nafion HP reference fuel cell.
